# Supplementary material
Source: publisher site journal article supplement (https://www.dovepress.com/get_supplementary_file.php?f=215478.xlsx)
Supplement: Supplementary file 1 [file get_supplementary_file.php]

## Sheet: Appendix 1-Japanese version
混合うつ病評価票
12-item questionnaire for depressive mixed state (DMX-12)
日付： 年 月 日 氏名： .									4 week
◆以下の質問について，０～３ のうち最もあてはまるものに ○ をつけてください。			まったくない				ときにそうなる				しばしばそうなる				いつもそうである
1	いつもよりも人の言葉や態度に敏感で傷付きやすい	0 － 1 － 2 － 3
2	ささいなことに対して，いつもと違って過剰に反応してしまう	0 － 1 － 2 － 3
3	気が散りやすく，ひとつのことにじっくり取り組めない	0 － 1 － 2 － 3
4	短時間で気分がめまぐるしく変わりやすい	0 － 1 － 2 － 3
5	気持ちがピンと張りつめていてリラックスできない	0 － 1 － 2 － 3
6	不愉快で不機嫌な気分におそわれる	0 － 1 － 2 － 3
7	頭の中で急かされるように色々な考えが空回りする	0 － 1 － 2 － 3
8	そわそわした気分でじっとしていられず落ち着かない	0 － 1 － 2 － 3
9	あとさきを考えずにいきなり行動に出てしまいそうになる	0 － 1 － 2 － 3
10	なぜかイライラしてかっとなりやすい	0 － 1 － 2 － 3
11	他人と意見が合わないと，すぐに口論したり，手が出そうになる	0 － 1 － 2 － 3
12	わざわざ危険をおかすような行動を選んでしまう	0 － 1 － 2 － 3
